# Supplementary material for: Porous carbon nitride rods as an efficient photoanode for water splitting and benzylamine oxidation
Source: Royal Society of Chemistry journal article supplement (doi:10.1039/d4ta00237g), 2024-01-01
Supplement: d4ta00237g1.pdf [file d4ta00237g1.pdf]

*Electronic Supplementary Information*

**Porous carbon nitride rods as an efficient photoanode for water splitting and benzylamine oxidation**

Sanjit Mondal, Gabriel Mark, Ayelet Tashakory, Michael Volokh, Menny Shalom\*

*Department of Chemistry and Ilse Katz Institute for Nanoscale Science and Technology, Ben-Gurion University of the Negev, Beer-Sheva 8410501, Israel.*

*Corresponding author E-mail: [mennysh@bgu.ac.il](mailto:mennysh@bgu.ac.il)*

## Detailed synthetic procedures

**Materials:** Melamine (99%) was purchased from Sigma-Aldrich. Ethylene glycol (EG,  $\geq 99.5\%$ ) and potassium persulfate ( $K_2S_2O_8$ ,  $\geq 99\%$ ) were bought from Merck. Dichloromethane ( $CH_2Cl_2$ , 99.5% amylene-stabilized), ethyl acetate ( $\geq 99\%$ ), (ethanol ( $\geq 99.9\%$ ) and acetone (99.5%) were purchased from Bio-Lab Ltd, Israel. Hydrochloric acid (HCl, AR, 35% wt.) was purchased from Carlo Erba. Potassium hydroxide pellets (KOH, AR, 85% wt.) sodium hydroxide (NaOH, 99%) and sodium sulfate anhydrous ( $Na_2SO_4$ , AR, 99%) were purchased from Loba Chemie, India. Triethanolamine (TEOA,  $\geq 99.0\%$ ) was purchased from Glentham, UK. FTO-coated glass ( $12\text{--}14 \Omega \text{ sq}^{-1}$ ) was bought from Xop Glass company, Spain. Deuterium oxide ( $D_2O$ , 99.9 at% D) was purchased from Sigma-Aldrich. Benzylamine ( $BnNH_2$ ,  $>99\%$ ) was purchased from TCI. In addition, deionized (DI) water with  $18.2 \text{ M}\Omega \text{ cm}$  resistivity was obtained from a Millipore Direct-Q3 water purification system. All chemicals were used as received from the respective commercial vendors without further purification.

**Characterization:** The structural analysis of all synthesized films was performed using powder X-ray diffraction patterns (XRD) recorded by a PANalytical's Empyrean diffractometer, equipped with a position-sensitive detector X'Celerator. Data was recorded with a scanning time of  $\sim 15$  min for  $2\theta$  ranging from  $5^\circ$  to  $60^\circ$  using Cu  $K\alpha$  radiation ( $\lambda = 1.54178 \text{ \AA}$ , 40 kV, 30 mA). Fourier-transform infrared spectroscopy (FTIR) was carried out to study the synthesized materials' functional groups on a Thermo Scientific Nicolet iS5 FTIR spectrometer (equipped with a Si attenuated total reflectance (ATR) accessory). X-ray photoelectron spectroscopy (XPS) measurements were performed on a Thermo Scientific ESCALAB 250 (Al  $K\alpha$ , 1486.6 eV). The valence band (VB) maximum energy was estimated using ultraviolet photoelectron spectroscopy (UPS) measurements in a Thermo Scientific ESCALAB Xi+ with a HeI excitation source. UV-vis absorption spectroscopy (Cary 100 spectrophotometer, equipped with a diffuse reflectance accessory (DRA)) and steady-state photoluminescence (PL) spectroscopy

(Horiba Scientific FluroMax 4 spectrofluorometer) were used to study the optical properties of the materials. Time-resolved fluorescence measurements were carried out on a time-correlated single-photon counting (TCSPC) setup with a Horiba Fluorolog modular spectrofluorometer. The PL lifetimes ( $\tau_{av}$ ) were calculated from the time-resolved PL spectra decay curves fitted using a tri-exponential function. The morphology of the supramolecular precursor and the final photoelectrodes were characterized by scanning electron microscopy (SEM) using an FEI Verios ultrahigh-resolution SEM (equipped with a FEG source and a TLD detector), operated at  $U_0 = 3.5$  kV and  $I = 25$  pA; to avoid charging effects, some samples were sputtered with  $\leq 5$  nm Au-Pd alloy using a Quorum Q150T ES system). In addition, elemental analysis data for carbon, hydrogen, and nitrogen (C, H, and N) was obtained using a Thermo Scientific Flash Smart elemental analyzer OEA 2000.

**PEC and electrochemical measurements:** All the photoelectrochemical measurements were carried out using a standard three-electrode system on a single-channel PalmSens4 potentiostat (PalmSens, Netherlands). A Pt foil (1.0 cm<sup>2</sup>) and Ag/AgCl (saturated KCl) were used as the counter- and reference-electrodes, respectively. 0.10 M KOH aqueous solution, (pH  $\sim$ 13.1) or 0.1 M KOH aqueous solution containing 10% v/v triethanolamine were used as the electrolyte for the photocurrent experiments. Additionally, 0.50 M Na<sub>2</sub>SO<sub>4</sub> and 0.50 M H<sub>2</sub>SO<sub>4</sub> aqueous solutions were also used for photocurrent measurements in neutral and acidic environments, respectively. The measured potentials ( $V_{Ag/AgCl}$ ) were converted to the reversible hydrogen electrode (RHE) scale using the following equation (room temperature; Ag/AgCl in saturated KCl reference electrode):

$$V_{RHE} = V_{Ag/AgCl} + 0.0591 \times \text{pH} + 0.197 \text{ V}$$

Photocurrent density of the CN films was measured at a bias potential of  $V_{RHE} = 1.23$  V (*i.e.*, 1.23 V versus (*vs.*) RHE) under 1 sun illumination (power density of  $\sim$ 100 mW cm<sup>-2</sup>) supplied by a Newport LCS-100 solar simulator (100 W Xe lamp and an integrated AM 1.5 filter,

calibrated using a Newport 919P power meter). Linear sweep voltammetry (LSV) measurements were performed in the dark and under 1 sun illumination in the range of 0–1.8 V vs. RHE. Electrochemical impedance spectroscopy (EIS) measurements and Mott-Schotky were performed using an Autolab potentiostat (Metrohm, PGSTAT302N). Mott–Schottky plots of CN films were measured in 0.5 M Na<sub>2</sub>SO<sub>4</sub> at a frequency of 1.0 kHz.

Oxygen (O<sub>2</sub>) generation for CN<sub>M-HCl(HT)</sub> film in 0.1 M KOH solution was detected using an optical fiber-based oxygen meter (Firesting GmbH, Germany) under chronoamperometric condition (1.23 V vs. RHE, 1 sun illumination) in a three electrode cell. The cell was tightly sealed with a rubber septum and parafilm to avoid gas leakage. The electrolyte solution was purged with Ar for 30 min before the experiments. The O<sub>2</sub> measurement was performed for a duration of 1 hour. The presented data was acquired after background subtraction. The Faradaic efficiency (FE) was calculated using equations S1–S2:

$$n = \frac{I \times t}{z \times F} \quad (\text{Eq. S1})$$

Where  $n$  is the O<sub>2</sub> amount (measured in mol),  $I$  stand for current (A),  $z$  is the number of transferred electrons (for O<sub>2</sub> evolution,  $z = 4$ ),  $t$  is the time (s), and  $F$  is the Faraday constant (96,485C mol<sup>-1</sup>).

The theoretical amount of O<sub>2</sub> was calculated from Equation S2:

$$\text{FE}(\%) = \frac{\text{Experimental } \mu\text{mol of O}_2}{\text{Theoretical } \mu\text{mol of O}_2} \times 100\% \quad (\text{Eq. S2})$$

For incident photon-to-current conversion efficiency (IPCE) measurements, a Zahner CIMPS-QE/IPCE photoelectrochemical workstation coupled with a TLS03 tunable light source controlled by a PP211 potentiostat (Zahner-Elektrik, Germany) in a dedicated three-electrode photoelectrochemical cell (PEEC-2) using an Ag/AgCl (sat. KCl) reference electrode and Pt coil as the counter electrode was used. The IPCE calculations were performed using equation S3:

$$\text{IPCE (\%)} = \frac{J (\text{mA cm}^{-2}) \cdot 1240}{\lambda(\text{nm}) \cdot I_{\text{incident}}(\text{mW cm}^{-2})} \times 100\% \quad (\text{Eq. S3})$$

Where  $J$  is the photocurrent density,  $I$  is the (calibrated to illumination spot of 8 mm in diameter) incident illumination power,  $\lambda$  is the illumination wavelength, and 1240 is the units conversion factor. The calculation was performed by the coupled ThalesXT software.

**Preparation of supramolecular assemblies:** In a typical synthesis, melamine (3.00 g) was dissolved in 60.0 mL DI H<sub>2</sub>O followed by the addition of HCl (0, 4.2, 8.4, or 12.6 mmol of HCl which corresponds to 0, 0.3, 0.6, or 0.9 mL of 35 wt. % HCl) and stirred at 600 rpm for 1 h. The resulting mixture was transferred into an 80 mL PTFE-lined autoclave and heated at 140 °C for 4 h. The supramolecular assemblies are denoted with the volume of used HCl and (HT) to mark the hydrothermal treatment (M(HT), M-HCl<sub>4.2</sub>(HT), M-HCl<sub>8.4</sub>(HT), and M-HCl<sub>12.6</sub>(HT)). All samples were collected by centrifugation and kept inside an oven at 60 °C overnight. Note that if concentration is not noted in the shorthand notation M-HCl(HT) it refers to M-HCl<sub>8.4</sub>(HT).

**Synthesis of  $CN_M$  films (serving as a reference or ‘control’ photoactive layer):** In a typical synthesis, a  $CN_M$  film was prepared by grinding melamine powder (1.00 g) in 0.6 mL ethylene glycol until obtaining a slurry. The obtained slurry was doctor-bladed onto a substrate (FTO-coated glass) with a predefined thickness achieved by setting  $L$  layers of scotch tape (in all samples  $L = 2$  unless stated otherwise for a thickness experiment where  $L$  was set also to 1 or 3). The obtained homogeneous slurry coating was subsequently dried on a hot plate (surface setpoint temperature,  $T_{SP} = 90\text{ }^\circ\text{C}$ ) for 30 min, and finally placed inside a glass test tube ( $d = 13$  mm) with 0.5 g of melamine powder at the bottom of the test-tube. The test tube was closed with an aluminum foil and calcined in a tube furnace at  $T_{SP} = 530\text{ }^\circ\text{C}$  for 4 h (heating profile from room temperature to  $T_{SP}$  at  $5\text{ }^\circ\text{C min}^{-1}$  heating rate) under a constant  $N_2$  flow.

Note that all the FTO substrates were cleaned before use by a successive sonication in an aqueous detergent solution (1% w/v Alconox), then DI water, acetone, and ethanol, and finally dried before performing the doctor-blade procedure.

**Synthesis of  $CN_{M(HT)}$  and  $CN_{M-HCl(HT)}$  films:**  $CN_{M(HT)}$  and  $CN_{M-HCl(HT)}$  films were prepared by grinding 1.00 g of supramolecular assemblies ( $M_{(HT)}$  and  $M_{HCl(HT)}$ , respectively) in 0.6 mL ethylene glycol until a homogeneous paste was obtained. The rest of the procedure (doctor-blading and calcination) is identical to the  $CN_M$  film protocol. Unless stated otherwise,  $CN_{M-HCl(HT)}$  refers to the films prepared from the supramolecular aggregate treated with 8.4 mmol HCl (*i.e.*,  $M-HCl(HT)$  is a short notation for  $M-HCl_{8.4}(HT)$ ).

## Electronic Supplementary Information Figures and Tables

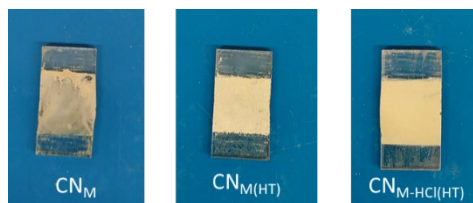

**Fig. S1** Images of the CN films.

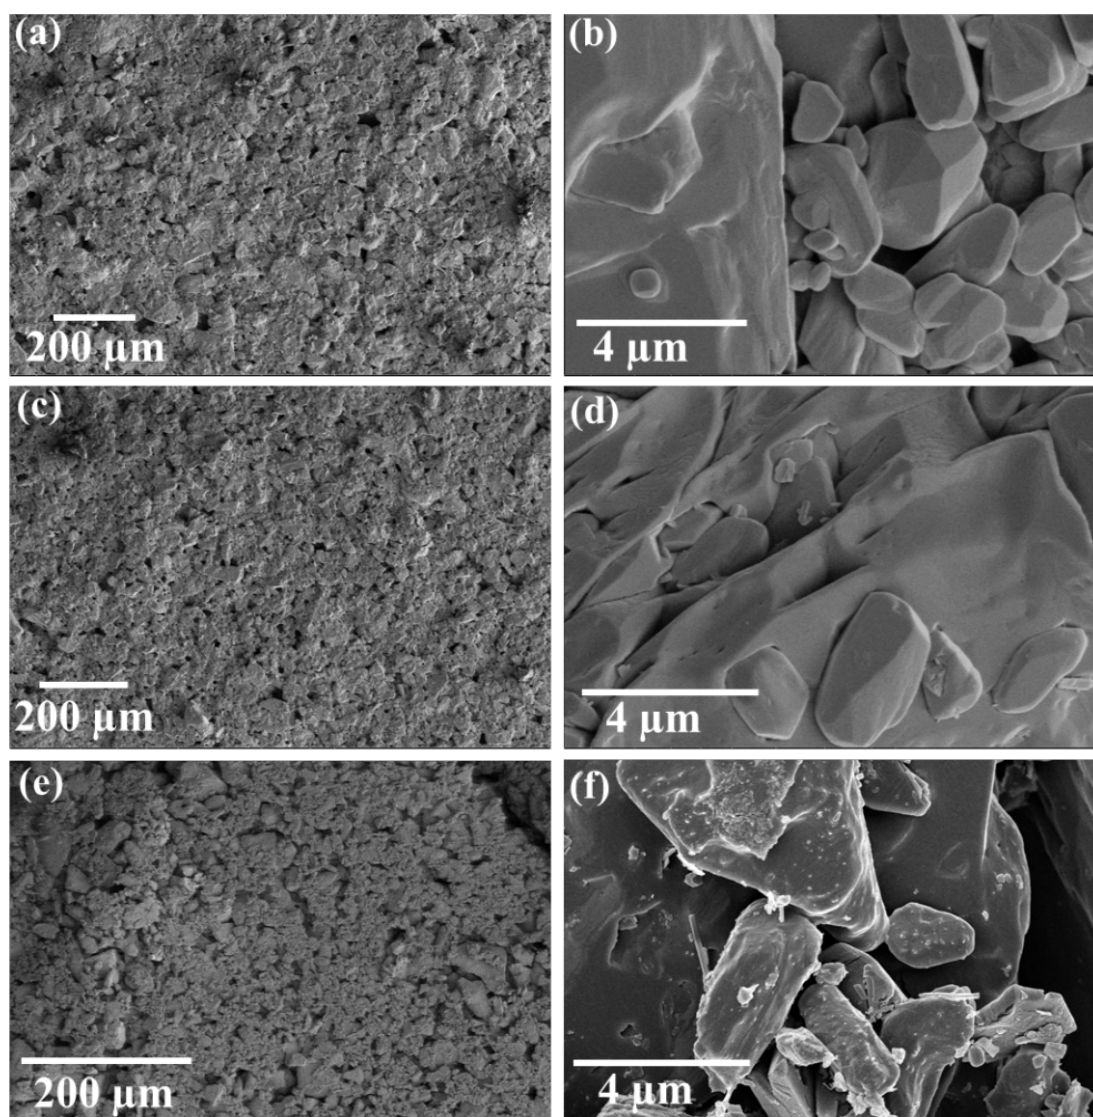

**Fig. S2** Top-view SEM images of the supramolecular assemblies (the CN precursors) at two magnifications. (a,b) M, (c,d) M(HT), and (e,f) M-HCl(HT).

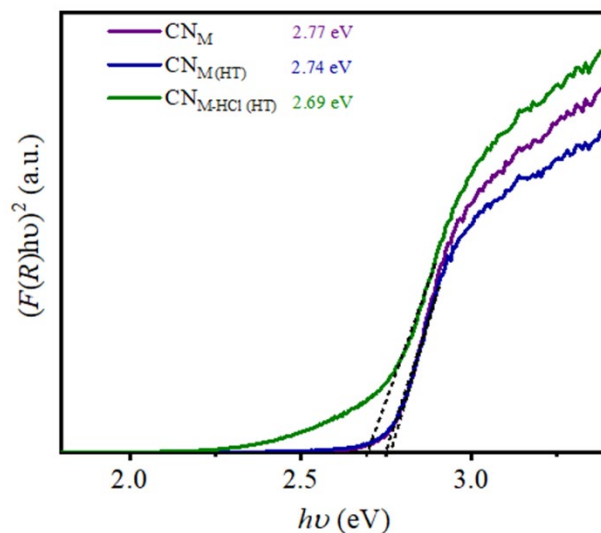

**Fig. S3** Tauc plot analyses of  $\text{CN}_M$ ,  $\text{CN}_{M(\text{HT})}$  and  $\text{CN}_{M\text{-HCl}(\text{HT})}$  films using a direct band gap assumption. As a measure of the absorbance coefficient, the Kubelka-Munk function,  $F(R)$ , is used.

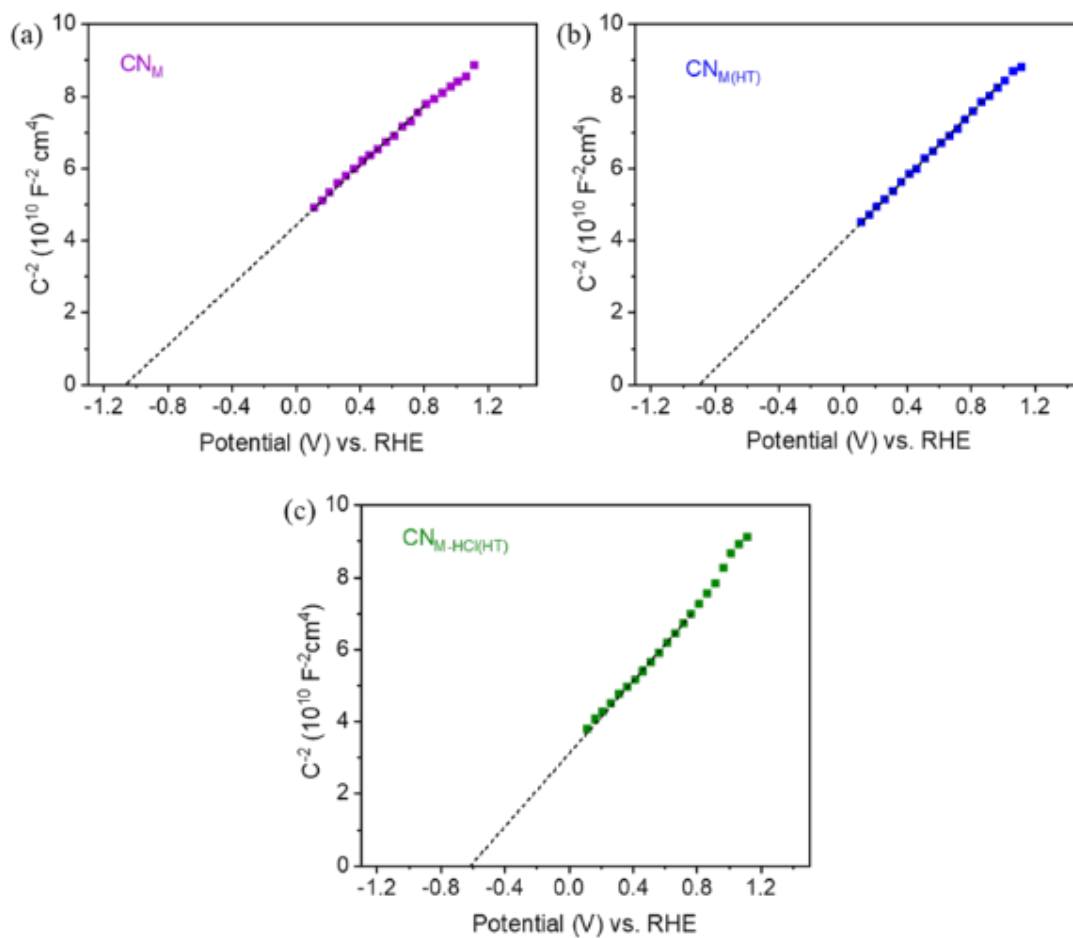

**Fig. S4** Mott-Schottky plots of  $\text{CN}_M$ ,  $\text{CN}_{M(\text{HT})}$ , and  $\text{CN}_{M\text{-HCl}(\text{HT})}$  electrodes in 0.5 M  $\text{Na}_2\text{SO}_4$  aqueous electrolyte (pH  $\sim 7$ ) confirming n-type characteristic of the CN films.



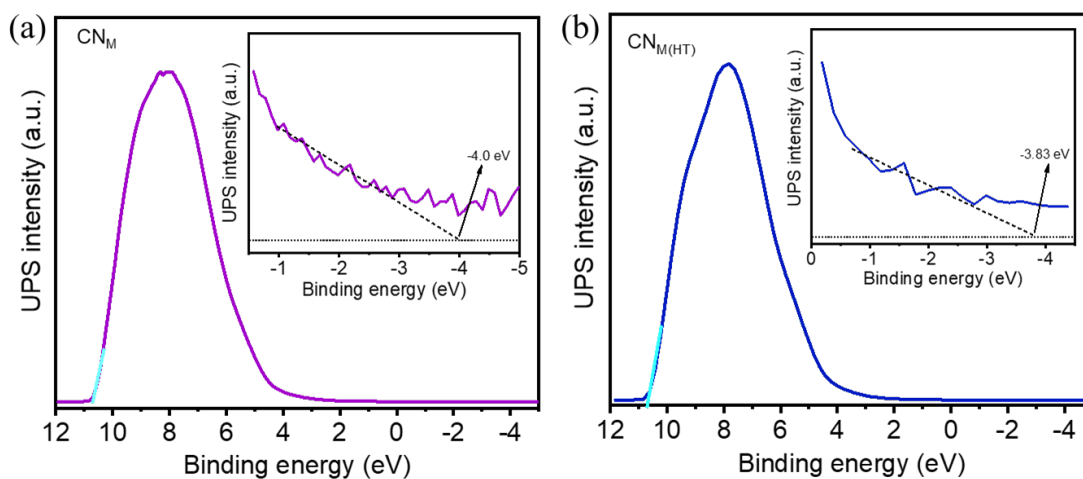

**Fig. S5** Valence band UPS of  $\text{CN}_M$  and  $\text{CN}_{M(\text{HT})}$  films.

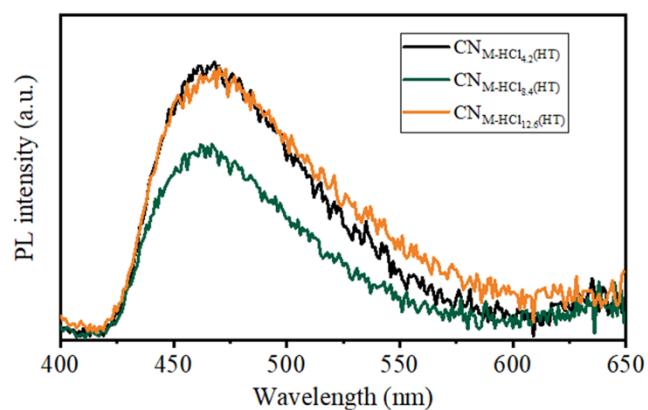

**Fig. S6** Photoluminescence (PL) emission spectra (excitation wavelength: 380 nm) of CN films with different amount of HCl added during the supramolecular assembly formation.

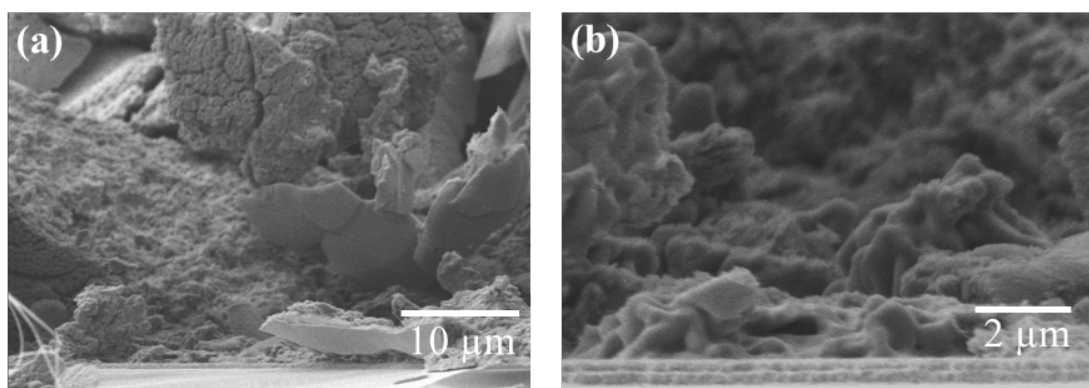

**Fig. S7** Cross-sectional images of a  $\text{CN}_{M-\text{HCl}(\text{HT})}$  film, exhibiting its intimate contact with the FTO layer.

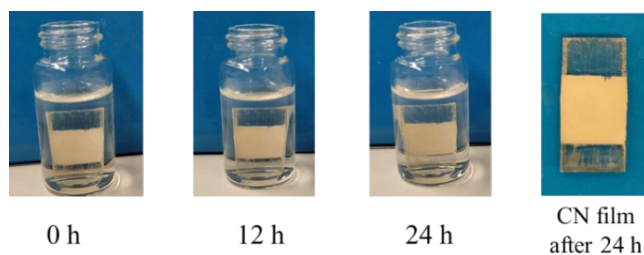

**Fig. S8** Images of the porous 1D CN electrode in water for 24 h (water immersion experiment).

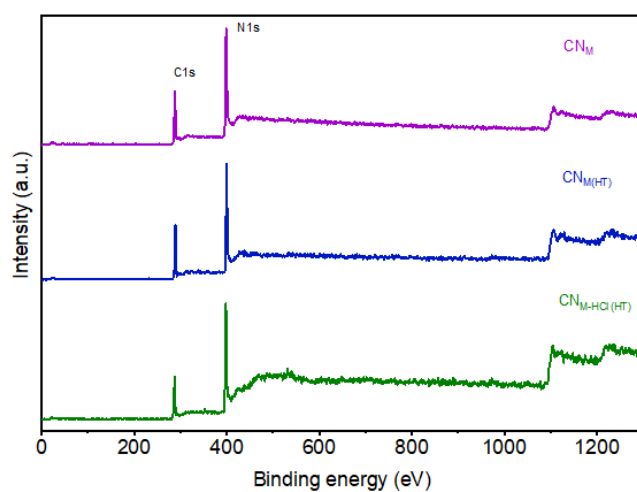

**Fig. S9** XPS survey spectra of  $\text{CN}_M$ ,  $\text{CN}_{M(\text{HT})}$ , and  $\text{CN}_{M-\text{HCl}(\text{HT})}$  films.

**Table S1.** Elemental (C, H, N) analysis data of  $\text{CN}_M$ ,  $\text{CN}_{M(\text{HT})}$ , and  $\text{CN}_{M-\text{HCl}(\text{HT})}$  samples. Percentage of O in the table was obtained by subtracting all other elements amount from 100%.

| Sample                                                  | C      | N      | H     | O     | C/N   |
|---------------------------------------------------------|--------|--------|-------|-------|-------|
| <b><math>\text{CN}_M</math></b>                         | 45.20% | 47.88% | 1.18% | 5.74% | 0.942 |
| <b><math>\text{CN}_{M(\text{HT})}</math></b>            | 43.25% | 50.16% | 1.47% | 5.13% | 0.865 |
| <b><math>\text{CN}_{M-\text{HCl}(\text{HT})}</math></b> | 41.89% | 53.01% | 2.03% | 3.07% | 0.80  |

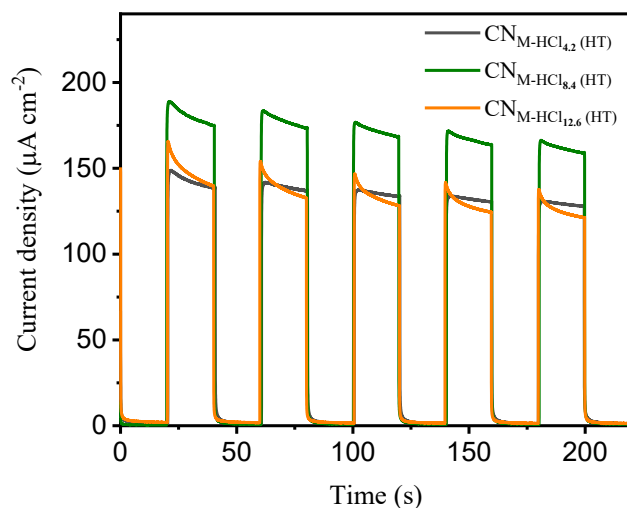

**Fig. S10** Chronoamperometry plots using  $\text{CN}_{\text{M-HCl}(\text{HT})}$  photoanodes prepared by adding different amounts of HCl during the supramolecular assembly formation.

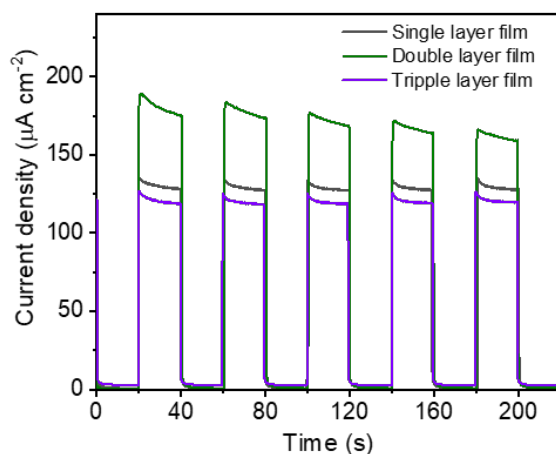

**Fig. S11** Chronoamperometry plots using  $\text{CN}_{\text{M-HCl}(\text{HT})}$  photoanodes prepared by varying the number of scotch tape layers ( $L = 1, 2, \text{ or } 3$ ) used as the barrier during the doctor blading procedure at 1.23 V vs. RHE upon on/off 1 sun illumination in 0.1 M KOH.

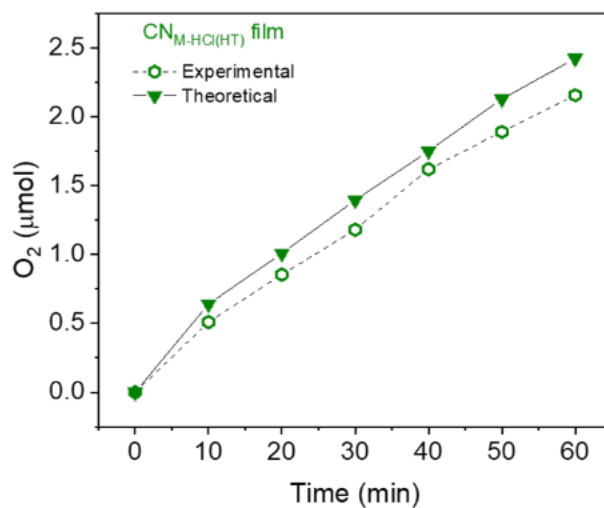

**Fig. S12** Measured O<sub>2</sub> production for CN<sub>M-HCl(HT)</sub> film in 0.1 M KOH.

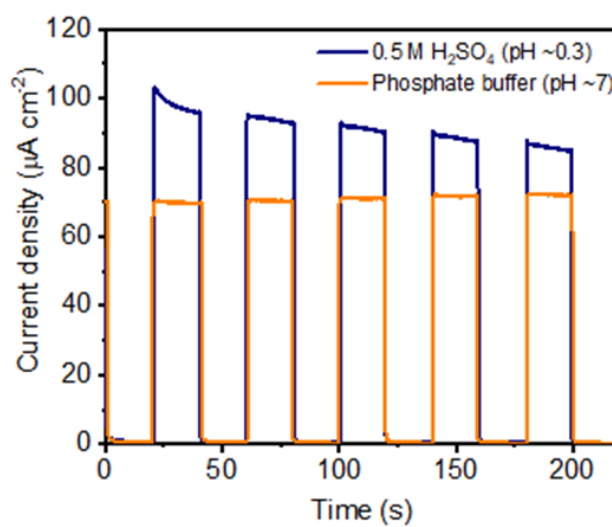

**Fig. S13** Chronoamperometry plot using CN<sub>M-HCl(HT)</sub> photoanodes in neutral and acidic electrolytes.

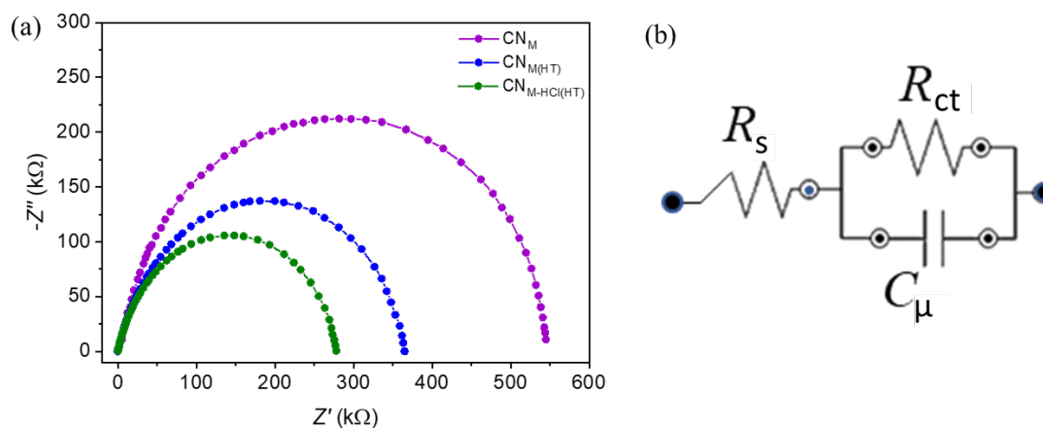

**Fig. S14** EIS analysis of  $CN_M$ ,  $CN_{M(HT)}$ , and  $CN_{M-HCl(HT)}$  films. (a) Nyquist plots showing the experimental data points and the fitted semicircles. Measurements were carried out in 0.5 M  $Na_2SO_4$  aqueous electrolyte (pH  $\sim 7$ ), (b) The equivalent circuit that was used for fitting. The following  $R_{ct}$  values were obtained from fitting:  $R_{ct}$  of  $CN_M = 545 \text{ k}\Omega$ ,  $R_{ct}$  of  $CN_{M(HT)} = 365 \text{ k}\Omega$ ,  $R_{ct}$  of  $CN_{M-HCl(HT)} = 278 \text{ k}\Omega$ .

In the equivalent circuit,  $R_s$  stands for series resistance,  $R_{ct}$  for charge transfer resistance, and  $C_\mu$  for double-layer capacitance.

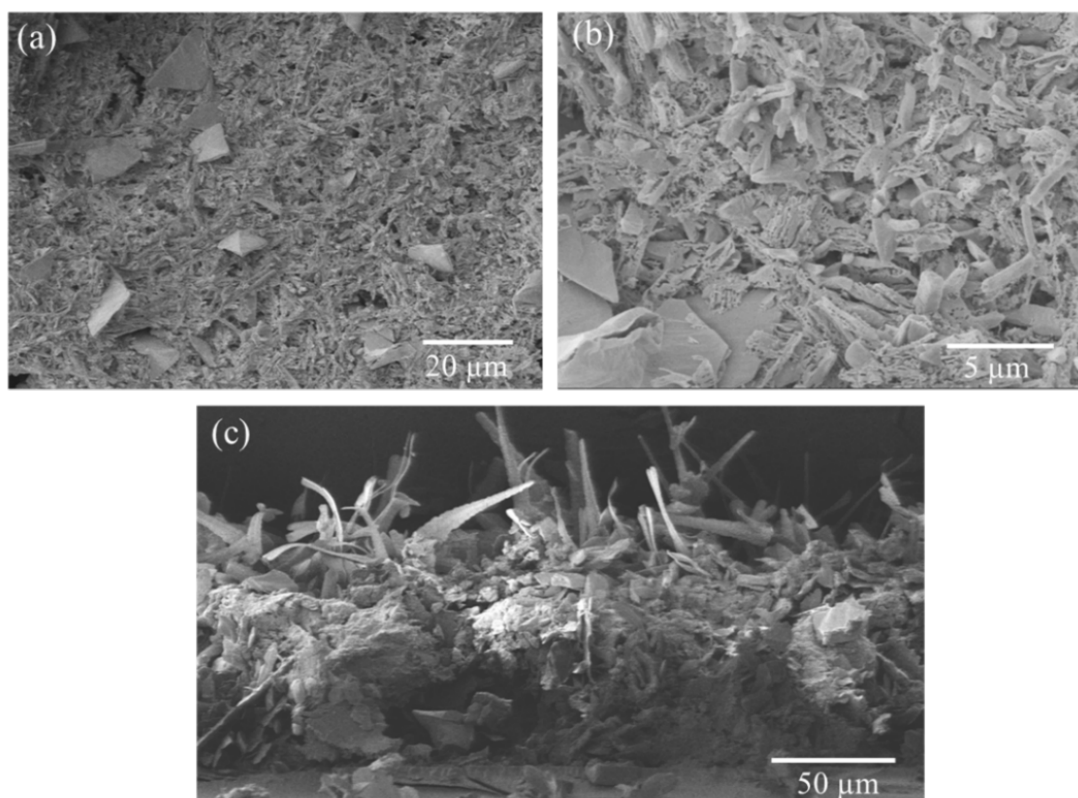

**Fig. S15** SEM images of  $CN_{M-HCl(HT)}$  photoanodes after the stability test. (a, b) Top-view and (c) cross-section.

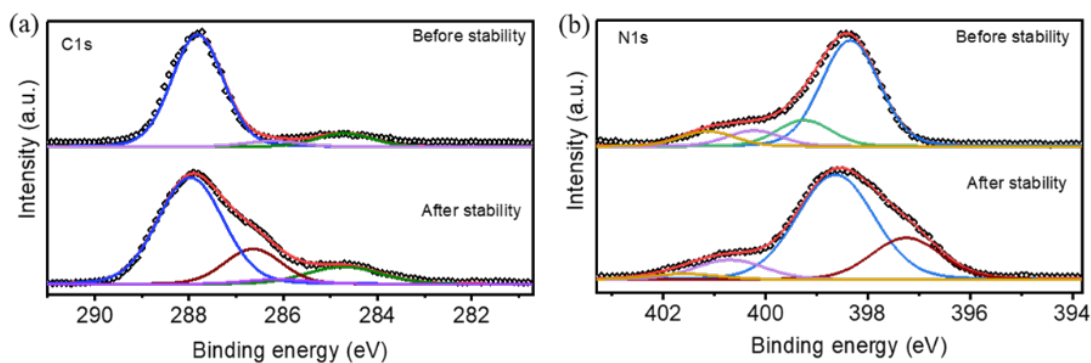

**Fig. S16** XPS fitting to a  $\text{CN}_{\text{M-HCl(HT)}}$  photoanode after 10 h of stability test. (a) C 1s and (b) N 1s.

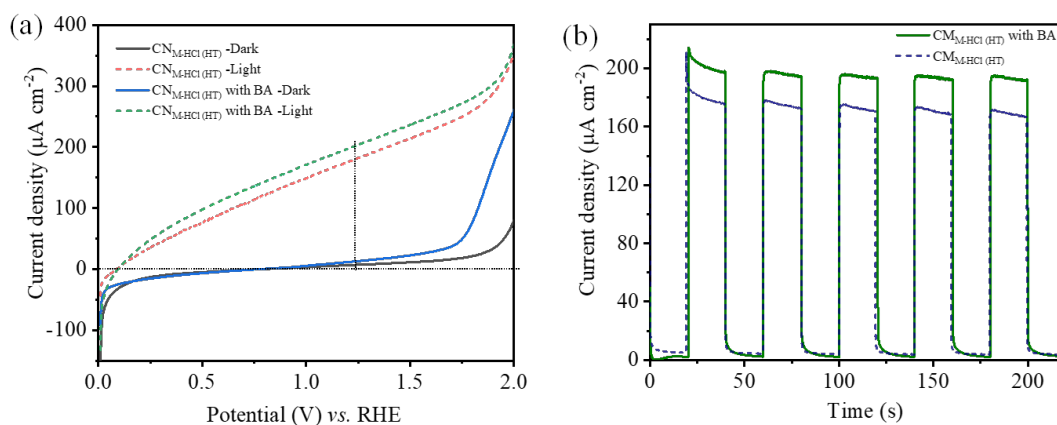

**Fig. S17** (a) Linear sweep voltammetry of  $\text{CN}_{\text{M-HCl(HT)}}$  with and without illumination under two different conditions: (i) with benzylamine (BA) and  $\text{O}_2$  saturated electrolyte solution, and (ii) without BA, and without oxygen, *i.e.*, Ar saturation. Each condition is measured in the dark (complete lines) and under 1 sun illumination (dashed line), (b) Chronoamperometry plot of  $\text{CN}_{\text{M-HCl(HT)}}$  under  $\text{O}_2$  saturation conditions with and without BA in 1 M NaOH electrolyte under 1 sun illumination.
